# Supplementary material for: Non-Small Cell Lung Cancer Harboring Concurrent EGFR Genomic Alterations: A Systematic Review and Critical Appraisal of the Double Dilemma
Source: MDPI journal article supplement (doi:10.3390/jmp2020016), 2021-06-04
Supplement: s1 [file s1]

## Electronic search strategy

1. We used a search strategy for randomized controlled trials (RCT) in Medline through Pubmed. The same search was then modified for RCT searches in other databases (Scopus, Controlled Cochrane Trial Register - CCTR).

```
((("NSCLC"[tiab] OR "Carcinoma, Non-Small-Cell Lung"[Mesh] OR "lung"[tiab])) AND ("egfr"[tiab] OR "ErbB Receptors"[Mesh]) AND ("concurrent"[tiab] OR "concomitant"[tiab] OR "coexisting"[tiab])) AND "complex"[tiab])  
AND
```

```
((("NSCLC"[tiab] OR "Carcinoma, Non-Small-Cell Lung"[Mesh] OR "lung"[tiab])) AND ("egfr"[tiab] OR "ErbB Receptors"[Mesh]) AND ("concurrent"[tiab] OR "concomitant"[tiab] OR "coexisting"[tiab]))
```

## 2. Cochrane Database search strategy

Search Name: Comutation

Comment:

| ID  | Search                                                   |
|-----|----------------------------------------------------------|
| #1  | lung neoplasm                                            |
| #2  | NSCLC                                                    |
| #3  | Non-small-cell lung cancer                               |
| #4  | #1 OR #2 OR #3                                           |
| #5  | metastasis                                               |
| #6  | MeSH descriptor: [Neoplasm Metastasis] explode all trees |
| #7  | recurrence                                               |
| #8  | advanced                                                 |
| #9  | MeSH descriptor: [Recurrence] explode all trees          |
| #10 | stage IV                                                 |
| #11 | Stage 4                                                  |
| #12 | #5 OR #6 OR #7 OR #8 OR #9 OR #10                        |
| #13 | EGFR                                                     |
| #14 | MeSH descriptor: [Genes, erbB-1] explode all trees       |
| #15 | #13 OR #14                                               |
| #16 | concomitant                                              |
| #17 | concurrent                                               |
| #18 | coexisting                                               |
| #19 | #16 OR #17 OR #18                                        |
| #20 | #4 AND #12 AND #15 AND #19                               |

3. We used the free text strategy “concurrent EGFR mutation in NSCLC”

**4.** We searched clinical trials and case reports for any other published data concerning concurrent EGFR mutation in the references cited. The strategy for RCT on-line searches in Clinical Trials registers ([www.clinicaltrials.gov](http://www.clinicaltrials.gov)) ("egfr"[tiab] OR "ErbB Receptors"[Mesh]) AND ("concurrent"[tiab] OR "concomitant"[tiab] OR "coexisting"[tiab]))
